# Supplementary material for: Humans Lack iGb3 Due to the Absence of Functional iGb3-Synthase: Implications for NKT Cell Development and Transplantation
Source: PLOS journal article supplement (doi:10.1371/journal.pbio.0060172), 2008-07-09
Supplement: S2 (10.1371/journal.pbio.0060172.s002) [file journal.pbio.0060172.s002]

| Lane | Primer Combination | Genomic Predicted size (bp) | cDNA Predicted size (bp) | Observed (bp) |
| --- | --- | --- | --- | --- |
| 1 | MO914+MO916 | 477 | 117 | ~490 |
| 2 | MO914+MO917 | 982 | 314 | ~1000 |
| 3 | MO903+MO916 | 243 | 53 | - |
| 4 | MO903+MO917 | 775 | 247 | ~750 |
| 5 | MO914+MO906 | 6278 | 1011 | - |
| 6 | MO886+MO887 | 568 | 568 | ~550 |
| 7 | MO886+MO906 | 685 | 685 | ~690 |
